# Supplementary material for: Inhibition of MLKL Attenuates Necroptotic Cell Death in a Murine Cell Model of Hepatic Ischaemia Injury
Source: PubMed Central journal article supplement (PMC7826539; doi:10.3390/jcm10020212), 2021-01-08
Supplement: jcm-10-00212-s001.pdf [file jcm-10-00212-s001.pdf]

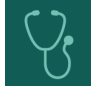

Supplementary material

## Inhibition of MLKL attenuates necroptotic cell death in a murine cell model of ischaemia injury

Raji Baidya <sup>1,2</sup>, J  r  mie Gautheron <sup>3,4</sup>, Darrell H. G. Crawford <sup>1,2</sup>, Haolu Wang <sup>2,5</sup> and Kim R. Bridle <sup>1,2,\*</sup>

<sup>1</sup> Faculty of Medicine, The University of Queensland, Brisbane, 4006, Queensland, Australia; r.baidya@uqconnect.edu.au (R.B.); d.crawford@uq.edu.au (D.H.G.C.)

<sup>2</sup> Gallipoli Medical Research Institute, Brisbane, 4120, Queensland, Australia; h.wang21@uq.edu.au

<sup>3</sup> Sorbonne University, Inserm, Centre de Recherche Saint-Antoine (CRSA), Paris, 75012, France; jeremie.gautheron@inserm.fr

<sup>4</sup> Institute of Cardiometabolism and Nutrition (ICAN), Paris, 75013, France

<sup>5</sup> Diamantina Institute, The University of Queensland, Brisbane, 4102, Queensland, Australia

\* Correspondence: k.bridle@uq.edu.au; Tel.: +61-7-3346-0698

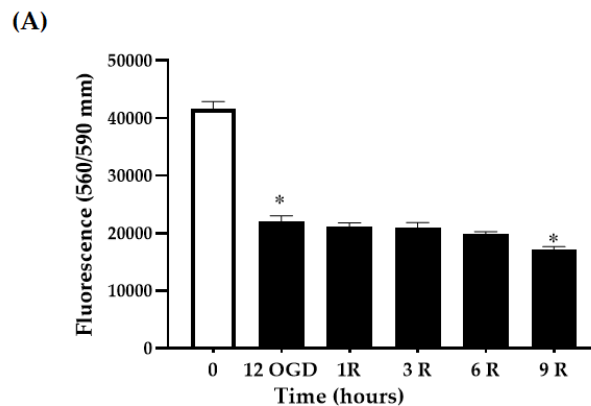

**Figure S1.** (A) Reoxygenation of AML-12 cells after 12 h of OGD exposure. Cell viability was assessed by fluorometric quantitation at 1, 3, 6 and 9 h of reoxygenation. \* $p < 0.0001$ .

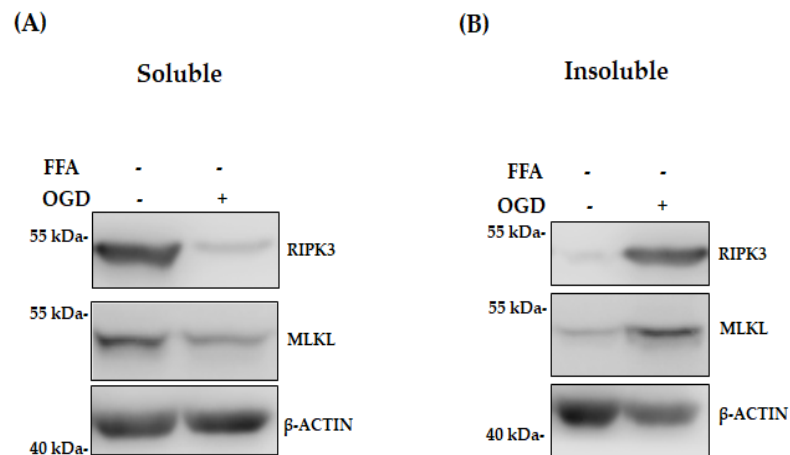

**Figure S2.** Expression of necroptotic proteins in OGD exposed cells. Relative protein expression in control cells and OGD cells were detected by western blot analysis; using antibodies against RIPK3 and MLKL.  $\beta$ -ACTIN was used as the loading control. A) Soluble protein B) Insoluble protein.  $\beta$ -ACTIN was used as the loading control.

(A)

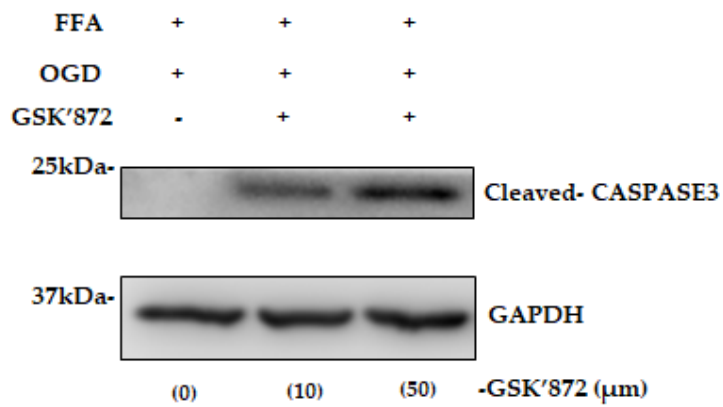

**Figure S3.** GSK'872 treatment of AML12 cells after FFA+OGD treatment. A) Relative protein expression of cleaved+CASPASE3 in FFA+OGD cells and FFA+OGD+GSK'872 treated cells were detected by western blot analysis; upper panel cleaved-CASPASE3, lower panel GAPDH. GAPDH was used as the loading control. Western blot results were quantitated using Image Studio Lite Verison 5.2.
